# Supplementary material for: The influence of copper(ii) ions on noncovalent interactions in the systems including phosphoserine and biogenic amines
Source: Royal Society of Chemistry journal article supplement (doi:10.1039/c0nj00459f), 2010-01-01
Supplement: c0nj00459f.pdf [file c0nj00459f.pdf]

## Supplementary Data

The overall protonation constants of the ligands and the overall stability constants of the binary complexes

| <i>Overall protonation constants <math>\log\beta</math> of the ligands</i> |              |            |            |            |
|----------------------------------------------------------------------------|--------------|------------|------------|------------|
|                                                                            | <i>Ser-P</i> | <i>Put</i> | <i>Spd</i> | <i>Spm</i> |
| HL                                                                         | 10.03        | 10.83      | 10.97      | 10.91      |
| H <sub>2</sub> L                                                           | 16.07        | 20.51      | 21.03      | 21.28      |
| H <sub>3</sub> L                                                           | 18.70        | ---        | 29.61      | 30.39      |
| H <sub>4</sub> L                                                           | 20.82        | ---        | ---        | 38.67      |

  

| <i>Overall stability constants <math>\log\beta</math> of the binary complexes</i> |              |            |            |            |
|-----------------------------------------------------------------------------------|--------------|------------|------------|------------|
|                                                                                   | <i>Ser-P</i> | <i>Put</i> | <i>Spd</i> | <i>Spm</i> |
| CuHL                                                                              | 15.02        | 15.83      | 18.91      | ---        |
| CuL                                                                               | 9.90         | 8.62       | 11.70      | 14.66      |
| CuL(OH)                                                                           | 2.29         | ---        | 2.90       | ---        |
| CuL(OH) <sub>2</sub>                                                              | -8.78        | ---        | ---        | ---        |
| CuL <sub>2</sub>                                                                  | 15.75        | 13.40      | 17.13      | ---        |
| CuL(HL)                                                                           | ---          | ---        | ---        | 29.32      |
| MH <sub>2</sub> L                                                                 | ---          | ---        | ---        | 27.63      |
| ML <sub>2</sub> (OH)                                                              | ---          | 0.065      | 6.72       | ---        |
